# Supplementary material for: Optimized Synthesis of Poly(Lactic Acid) Nanoparticles for the Encapsulation of Flutamide
Source: MDPI journal article supplement (doi:10.3390/gels10040274), 2024-04-18
Supplement: s1 [file s1]

# Optimized Synthesis of Poly(Lactic Acid) Nanoparticles for the Encapsulation of Flutamide

Duarte Almeida <sup>1,2,†</sup>, Mariana Dias <sup>3,†</sup>, Beatriz Teixeira <sup>4</sup>, Carolina Frazão <sup>4</sup>, Mónica Almeida <sup>4</sup>,  
Gil Gonçalves <sup>1,2</sup>, Miguel Oliveira <sup>4,\*</sup> and Ricardo J. B. Pinto <sup>3,\*</sup>

<sup>1</sup> TEMA—Centre for Mechanical Technology and Automation, Department of Mechanical Engineering, University of Aveiro, Campus de Santiago, 3810-193 Aveiro, Portugal; duarte99@ua.pt (D.A.); ggoncalves@ua.pt (G.G.)

<sup>2</sup> Intelligent Systems Associate Laboratory (LASI), 4800-058 Guimarães, Portugal

<sup>3</sup> CICECO—Aveiro Institute of Materials, Department of Chemistry, University of Aveiro, Campus de Santiago, 3810-193 Aveiro, Portugal; marianamdias@ua.pt

<sup>4</sup> CESAM—Centre for Environmental and Marine Studies, Department of Biology, University of Aveiro, Campus de Santiago, 3810-193 Aveiro, Portugal; beatrizteixeira99@ua.pt (B.T.); carolina.frazao@ua.pt (C.F.); monica.alm@ua.pt (M.A.)

\* Correspondence: migueloliveira@ua.pt (M.O.); r.pinto@ua.pt (R.J.B.P.)

† These authors contributed equally to this work.

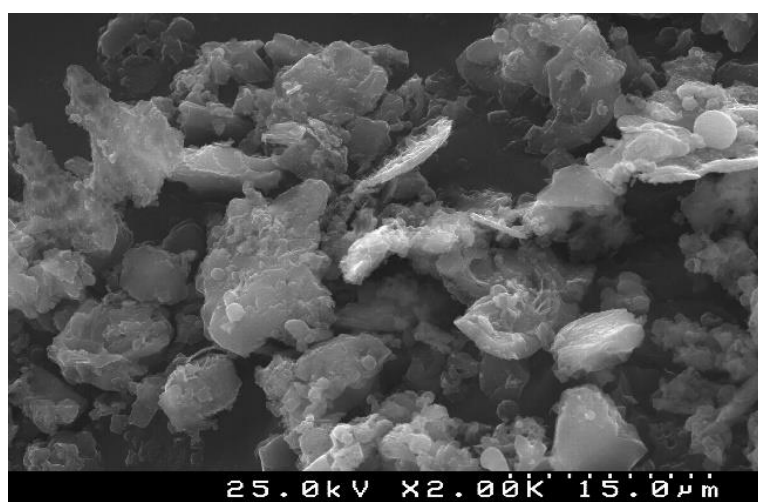

**Figure S1.** SEM micrograph of PLA MS sample.

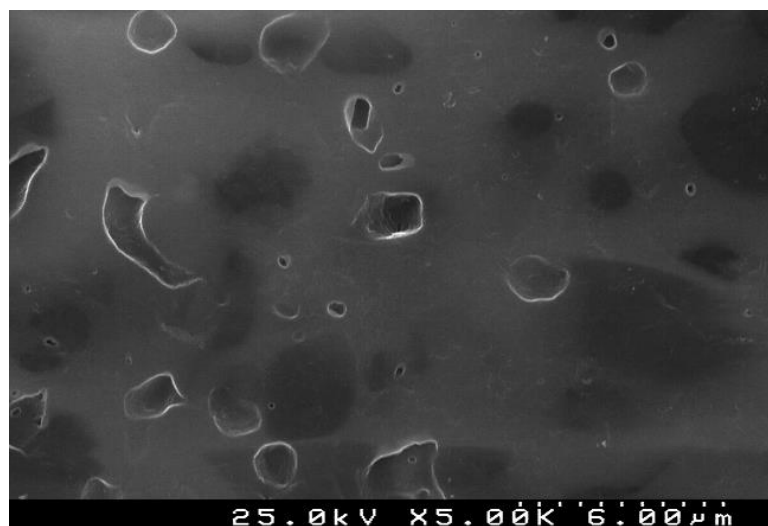

**Figure S2.** The gel formed in the absence of PVA as the surfactant.

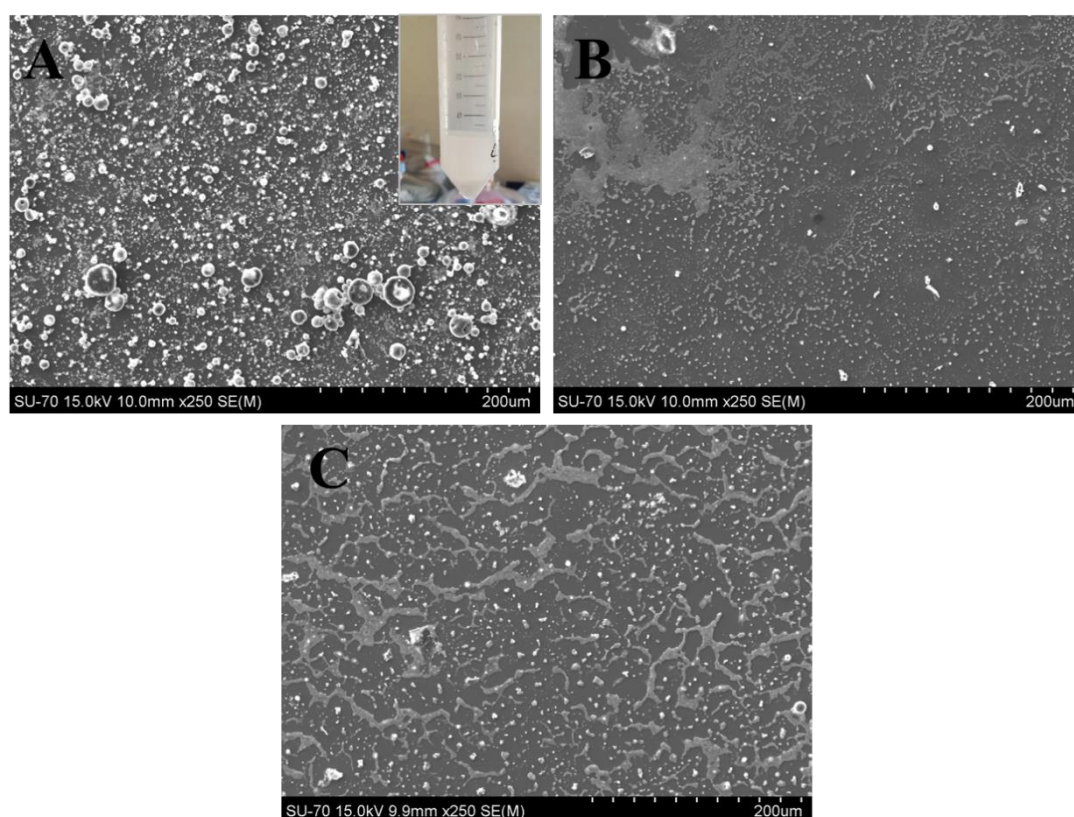

**Figure S3.** SEM micrograph of A) PVA<sub>0.1</sub> (with respective digital image), B) PVA<sub>2.5</sub>, and PVA<sub>10</sub> samples at lower magnification (250x).

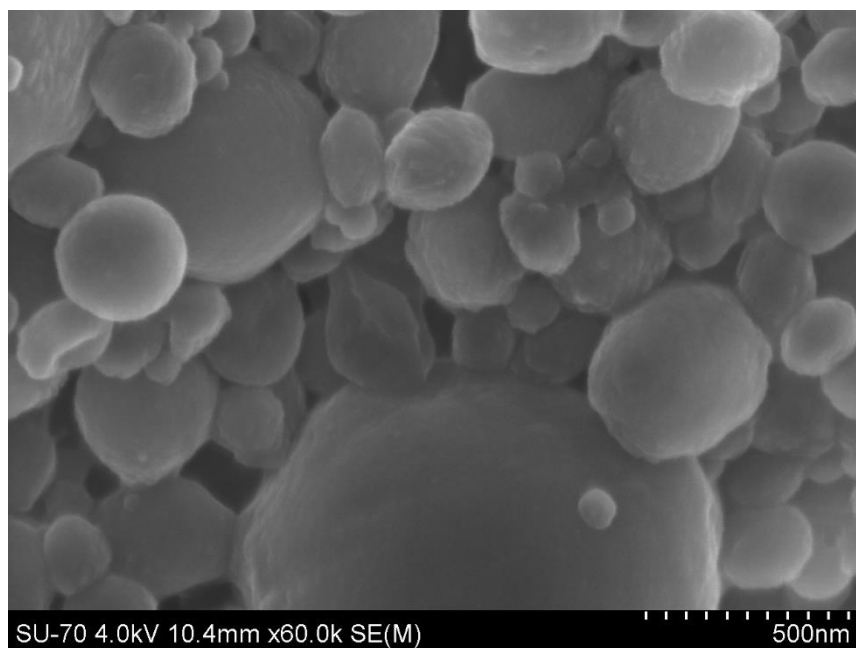

**Figure S4.** SEM image of FLU@PLA NPs at a magnification of 60kx.

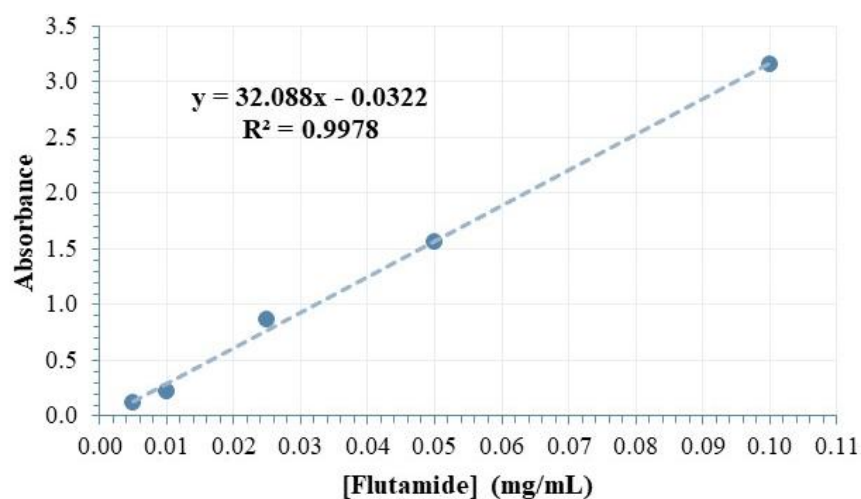

**Figure S5.** Calibration curve of Flutamide (0.005-0.1 mg/mL) at 300 nm.

**Table S1** – Values of FLU concentration, FLU mass, and percentages of FLU released in each wash supernatant and overall.

| Sample        | [FLU]<br>(mg/mL) | m <sub>FLU</sub><br>(mg) | % FLU | % Total<br>released |
|---------------|------------------|--------------------------|-------|---------------------|
| Supernatant 1 | 2.54             | 12.7                     | 50.8  | 56.1                |
| Supernatant 2 | 0.0423           | 0.211                    | 0.846 |                     |

|               |        |       |      |  |
|---------------|--------|-------|------|--|
| Supernatant 3 | 0.0537 | 0.484 | 1.93 |  |
| Supernatant 4 | 0.0689 | 0.620 | 2.48 |  |
